# Supplementary material for: BaCO3 mesocrystals: new morphologies using peptide–polymer conjugates as crystallization modifiers
Source: Royal Society of Chemistry journal article supplement (doi:10.1039/c0cp00819b), 2010-01-01
Supplement: c0cp00819b.pdf [file c0cp00819b.pdf]

Supporting information for

## **BaCO<sub>3</sub> Mesocrystals: New morphologies using peptide-polymer conjugates as crystallization modifiers**

Tongxin Wang<sup>a,b</sup>, James Mitchell<sup>b</sup>, Hans Börner<sup>‡<sup>a</sup></sup>, Helmut Cölfen<sup>§\*<sup>a</sup></sup>, Markus

Antonietti<sup>\*<sup>a</sup></sup>

<sup>a</sup> *Max-Planck-Institute of Colloids and Interfaces, Department of Colloid  
Chemistry, Research Campus Golm, D-14424 Potsdam, Germany*

<sup>b</sup> *Crest Center for Nanomaterials, Howard University, Washington, DC  
20059, USA*

<sup>‡</sup> *Present address: Department of Chemistry, Humboldt-Universität zu  
Berlin, Brook Taylor-Str. 2, Berlin, Germany*

<sup>§</sup> *Present address: University of Konstanz, Physical Chemistry,  
Universitätsstr. 10, D-78457 Konstanz, Germany*

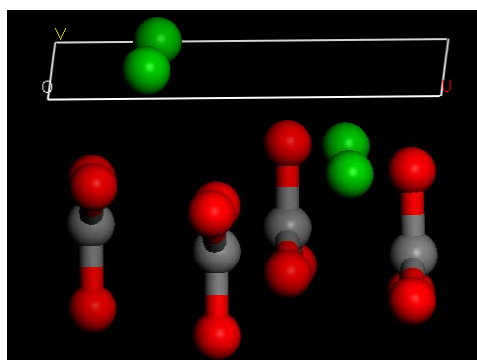

Figure S1: Surface cut of the witherite (110) face.

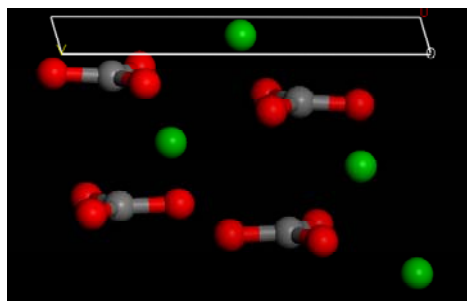

Figure S2: Surface cut of the witherite (001) face.

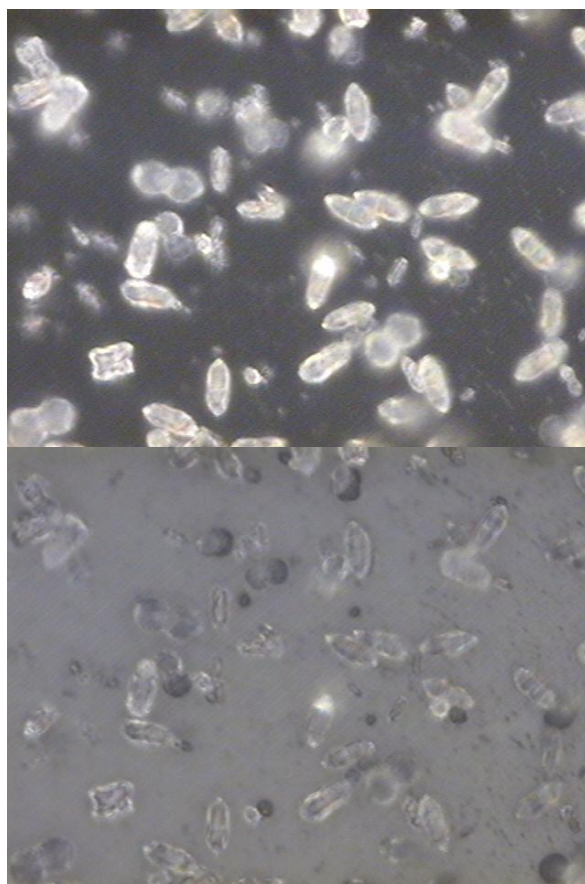

Figure S3: Polarized image of the dumbbell structure (sample Ac) showing the uniform orientation.
